# Supplementary material
Source: Springer Nature journal article supplement (https://www.springermedizin.de/resource/supplementary/12985_2011_1544_MOESM3_ESM.pdf/9610044)
Supplement: MOESM3 [file 9610044]

|             |     |     |     |       |     |     |     |     |     |     |     |     |     |
|-------------|-----|-----|-----|-------|-----|-----|-----|-----|-----|-----|-----|-----|-----|
|             | 203 | 204 | 205 | 206   | 207 | 208 | 209 | 210 | 211 | 212 | 213 | 214 |     |
| TTTGTCCGCAG | GTG | GCT | GCT | GCC   | AAA | TCA | TCT | GAA | AAT | GAC | AGG | CTG |     |
|             | ^   | Val | Ala | Ala   | Ala | Lys | Ser | Ser | Glu | Asn | Asp | Arg | Leu |
|             |     |     |     | (Ser) |     |     |     |     |     |     |     |     |     |

|     |     |     |     |     |     |            |            |            |            |            |            |            |            |            |
|-----|-----|-----|-----|-----|-----|------------|------------|------------|------------|------------|------------|------------|------------|------------|
| 215 | 216 | 217 | 218 | 219 | 220 | 221        | 222        | 223        | 224        | 225        | 226        | 227        | 228        | 229        |
| CGC | CTC | CTG | TTG | AAG | CAG | ATG        | TGC        | CCA        | AGC        | CTG        | GAT        | GTT        | GAC        | TCC        |
| Arg | Leu | Leu | Leu | Lys | Gln | <u>Met</u> | <u>Cys</u> | <u>Pro</u> | <u>Ser</u> | <u>Leu</u> | <u>Asp</u> | <u>Val</u> | <u>Asp</u> | <u>Ser</u> |

|            |            |            |            |            |            |            |            |            |            |            |            |            |            |            |
|------------|------------|------------|------------|------------|------------|------------|------------|------------|------------|------------|------------|------------|------------|------------|
| 230        | 231        | 232        | 233        | 234        | 235        | 236        | 237        | 238        | 239        | 240        | 241        | 242        | 243        | 244        |
| ATT        | ATC        | CCC        | CGG        | ACA        | CCA        | GAT        | GTT        | TTA        | CAC        | GAG        | GAT        | CTC        | TTA        | AAT        |
| <u>Ile</u> | <u>Ile</u> | <u>Pro</u> | <u>Arg</u> | <u>Thr</u> | <u>Pro</u> | <u>Asp</u> | <u>Val</u> | <u>Leu</u> | <u>His</u> | <u>Glu</u> | <u>Asp</u> | <u>Leu</u> | <u>Leu</u> | <u>Asn</u> |

245  
TTC TCCCGTTATTGAAACCACGCCTGCTTCACG  
Phe ^
